# Supplementary material
Source: publisher site journal article supplement (https://www.spandidos-publications.com/5015/downloadSupplementary)

Figure S1. Correlation between methylenetetrahydrofolate dehydrogenase 2 expression and various immune-related molecules, as determined using the TIMER database, including immune-stimulators, immune-inhibitors, MHC molecules, chemokines and receptors. The color represents the correlation r-value, yellow indicates positive correlation and blue indicates negative correlation, whereas white means the molecule is not expressed in the samples. \*P<0.05, \*\*P<0.01, \*\*\*P<0.001.

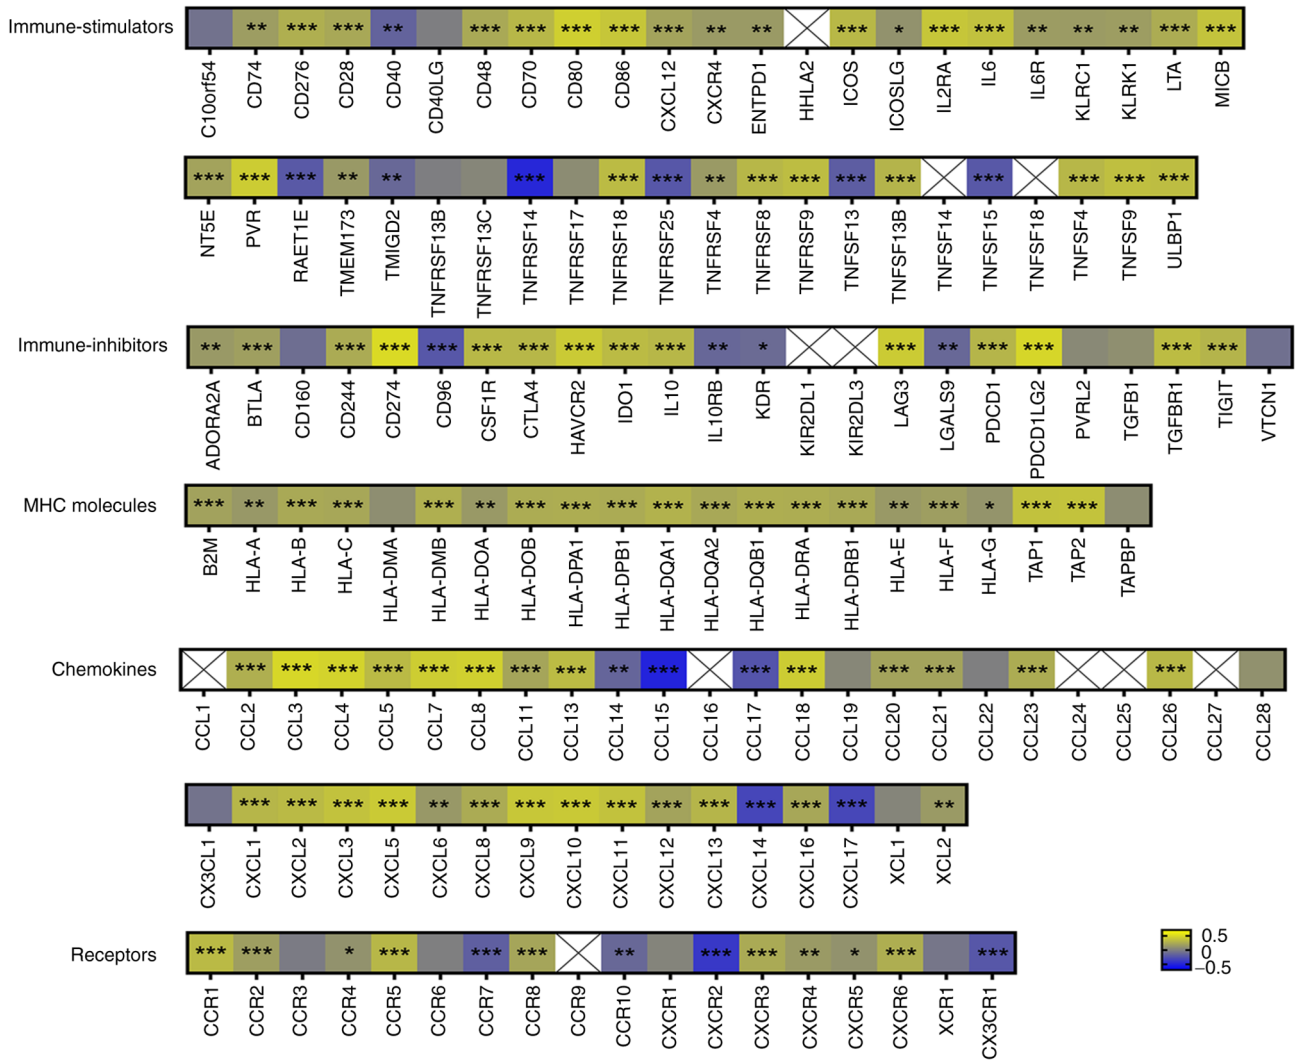

Supplement: Supplementary file 1 [file downloadSupplementary]
